# Supplementary material
Source: PubMed Central journal article supplement (PMC516240)
Supplement: jamia_M1548_1.pdf [file jamia_M1548_1.pdf]

Online version

Table 4B - Informatics Strategies and Data Sources of Selected Veterans Affairs Quality Enhancement Research Initiative (QUERI) Disease-Focused Service Directed Projects

| <b>QUERI Disease Focus &amp; Research Project Title</b>                                                                       | <b>Research Objectives</b>                                                                                                                                                                                                                                                                                                                                                                                                                                                                                                                                                                                                                | <b>Data Collection Approaches</b>                                                                                                                                                                                                                                                                                                                                                                                                                                                                                            | <b>Informatics Tools</b>                                                                                                                                                                                                                                                                                                |
|-------------------------------------------------------------------------------------------------------------------------------|-------------------------------------------------------------------------------------------------------------------------------------------------------------------------------------------------------------------------------------------------------------------------------------------------------------------------------------------------------------------------------------------------------------------------------------------------------------------------------------------------------------------------------------------------------------------------------------------------------------------------------------------|------------------------------------------------------------------------------------------------------------------------------------------------------------------------------------------------------------------------------------------------------------------------------------------------------------------------------------------------------------------------------------------------------------------------------------------------------------------------------------------------------------------------------|-------------------------------------------------------------------------------------------------------------------------------------------------------------------------------------------------------------------------------------------------------------------------------------------------------------------------|
| Human Immunodeficiency Virus (HIV) / Acquired Immune Deficiency Syndrome (AIDS): Improving Care Quality for patients with HIV | <ol style="list-style-type: none"> <li>1) Implement and evaluate real-time Clinical Reminders, group-based intensive quality improvement program, and interaction of the two</li> <li>2) Recommend intervention and implementation strategies for dissemination throughout the Veterans Administration (VA)</li> </ol>                                                                                                                                                                                                                                                                                                                    | <ul style="list-style-type: none"> <li>▪ Immunology Case Registry (ICR) data extraction software (LABGRAB)</li> <li>▪ Survey: Clinician Leader Survey to provide feedback to facilities</li> <li>▪ Outpatient records extracted from the Outpatient Care file (OPC)</li> </ul>                                                                                                                                                                                                                                               | <ul style="list-style-type: none"> <li>▪ ICR data extraction software (LABGRAB) utilized to collect outcome data from the Veterans Health Information Systems and Technology Architecture (VistA)</li> <li>▪ Clinical Reminders created and implemented within the Computerized Patient Record System (CPRS)</li> </ul> |
| Ischemic Heart Disease (IHD): Translation Plan to Improve Lipid Management for IHD Patients                                   | <ol style="list-style-type: none"> <li>1) Improve health of veterans with IHD in Veterans Integrated System Network (VISN) 20 via increases in: lipid measurement, appropriate use of lipid lowering agents, number of patients with low-density lipoprotein levels at guideline recommendation,</li> <li>2) Further evaluate and refine intervention from Lipid Measurement and Management System pilot in VISN 20 using continuous quality improvement</li> <li>3) Develop and evaluate Lipid Clinical Reminders</li> <li>4) Design, test, and implement national data reporting system for lipid measurement and management</li> </ol> | <ul style="list-style-type: none"> <li>▪ Audio-taped interviews with clinicians</li> <li>▪ Vitals, lab data, recruitment data, and Clinical Reminders retrieved from existing databases</li> </ul>                                                                                                                                                                                                                                                                                                                           | <ul style="list-style-type: none"> <li>▪ Lipid Clinical Reminders created and implemented in CPRS</li> <li>▪ Vitals, lab data, recruitment and Clinical Reminders data retrieved via CPRS</li> </ul>                                                                                                                    |
| Mental Health (MH): Translating Best Practices for Depression Care into Veterans Administration (VA) Care Solutions           | <ol style="list-style-type: none"> <li>1) Adapt effective depression collaborative care model to diverse Veterans Administration settings</li> <li>2) Assist VISN to implement collaborative care</li> <li>3) Evaluate success of intervention implementation</li> </ol>                                                                                                                                                                                                                                                                                                                                                                  | <ul style="list-style-type: none"> <li>▪ Structured interviews of patients and VISN, primary care, and mental health leaders</li> <li>▪ Depression Care Reports: aggregate, clinical, and administrative data, including depression symptoms and functioning, on patients referred to depression care management</li> <li>▪ Patient Survey: Randomly selected enrolled patients are assessed for depression and followed for six months</li> <li>▪ Clinic Data: Local workload and management information reports</li> </ul> | <ul style="list-style-type: none"> <li>▪ Survey records and Depression Care Reports via Internet and VA network</li> <li>▪ Microsoft Access for data management and dissemination</li> </ul>                                                                                                                            |

Online version

|                                                                                                        |                                                                                                                                                                                                                                                                                                                                                                                                                                                                                                                                                                                                                                                                                                                                                                                                                                                                                                                                                                                                                                              |                                                                                                                                                                                                                                                                                                                                                                                                                          |                                                                                                                                                                                                   |
|--------------------------------------------------------------------------------------------------------|----------------------------------------------------------------------------------------------------------------------------------------------------------------------------------------------------------------------------------------------------------------------------------------------------------------------------------------------------------------------------------------------------------------------------------------------------------------------------------------------------------------------------------------------------------------------------------------------------------------------------------------------------------------------------------------------------------------------------------------------------------------------------------------------------------------------------------------------------------------------------------------------------------------------------------------------------------------------------------------------------------------------------------------------|--------------------------------------------------------------------------------------------------------------------------------------------------------------------------------------------------------------------------------------------------------------------------------------------------------------------------------------------------------------------------------------------------------------------------|---------------------------------------------------------------------------------------------------------------------------------------------------------------------------------------------------|
| <p>MH: Translation plan to Improve Antipsychotic Treatment</p>                                         | <p>1) Compare QUERI-recommended intervention to basic intervention regarding medication management in schizophrenia<br/>                 2) Prepare MH QUERI translation package for pilot test of national rollout strategy in two VISNs<br/>                 3) Facilitate a pilot of the QUERI recommended intervention in two VISNs</p>                                                                                                                                                                                                                                                                                                                                                                                                                                                                                                                                                                                                                                                                                                  | <ul style="list-style-type: none"> <li>▪ Chart Reviews to determine medication adjustment needs pre- and post-intervention</li> <li>▪ Survey for clinicians regarding guidelines and use of informatics tools</li> </ul>                                                                                                                                                                                                 | <ul style="list-style-type: none"> <li>▪ Clinical Reminders created and implemented within CPRS for medication prescribing practices</li> <li>▪ <i>VistA</i> Structured Query Language</li> </ul> |
| <p>Spinal Cord Injury (SCI): Increasing Influenza Vaccination rates in the Veteran SCI Population</p>  | <p>To increase influenza vaccination rates and decrease morbidity and mortality due to respiratory infection in veterans with SCI at eight pilot sites.</p>                                                                                                                                                                                                                                                                                                                                                                                                                                                                                                                                                                                                                                                                                                                                                                                                                                                                                  | <ul style="list-style-type: none"> <li>▪ Vaccination rates - patient surveys and data supplied by the Office of Quality and Performance External Peer Review Program chart review program</li> <li>▪ Hospital discharges and visits for respiratory infections – National Patient Care Database (NPCD)</li> </ul>                                                                                                        | <ul style="list-style-type: none"> <li>▪ NPCD</li> <li>▪ Spinal Cord Dysfunction Registry database</li> </ul>                                                                                     |
| <p>Diabetes Mellitus (DM): A Custom Approach to Implementation of Diabetes Hypertension Guidelines</p> | <p>Evaluate construct validity and reliability of physician classification instrument in treatment of diabetes hypertension.</p>                                                                                                                                                                                                                                                                                                                                                                                                                                                                                                                                                                                                                                                                                                                                                                                                                                                                                                             | <ul style="list-style-type: none"> <li>▪ Questionnaire mailed to physicians, with responses linked to Pharmacy Benefits Management (PBM) data to track prescribing behavior</li> <li>▪ Semi-structured interviews with physicians</li> <li>▪ Healthcare Analysis and Information Group data for labs</li> <li>▪ OPC data for diagnosis</li> </ul>                                                                        | <ul style="list-style-type: none"> <li>▪ PBM database.</li> <li>▪ Healthcare Analysis and Information Group’s Diabetes Registry and Dataset.</li> <li>▪ OPC File</li> </ul>                       |
| <p>DM: Improving Hypertension Control: A Physician Intervention</p>                                    | <p>1) Reduce proportion of patients with uncontrolled hypertension via educating physicians to use patient-centered counseling and compare relative impact of each intervention<br/>                 a) Examine whether the interventions decrease disparities in the number of African-American patients with uncontrolled hypertension<br/>                 2) Improve patients’ compliance with anti-hypertension treatment<br/>                 a) Examine whether the interventions decrease racial disparities in patient compliance with anti-hypertension treatment<br/>                 3) Improve physicians’ communication with patients regarding medication use via increasing frequency of physicians’ provision of advice and counseling about hypertension medications<br/>                 a) Examine racial disparities in physicians' provision of advice and counseling about anti-hypertensive medications, and whether the proposed interventions will decrease racial disparities in such physician communication</p> | <ul style="list-style-type: none"> <li>▪ Exit interview with sample of uncontrolled hypertension patients regarding dynamics of physician consultation</li> <li>▪ Audio-taped interview of physician and patient to assess patterns of communication</li> <li>▪ Medication compliance data extracted from the PBM database</li> <li>▪ Patient demographics and blood pressure extracted from the <i>VistA</i></li> </ul> | <ul style="list-style-type: none"> <li>▪ Hypertension Clinical Reminders created and implemented within CPRS</li> <li>▪ PBM database</li> <li>▪ <i>VistA</i></li> </ul>                           |
